# Supplementary material for: Examining the effects of transcranial direct current stimulation on human episodic memory with machine learning
Source: PubMed Central journal article supplement (PMC7725363; doi:10.1371/journal.pone.0235179), 2020-12-09
Supplement: pone.0235179.s003.pdf [file pone.0235179.s003.pdf]

## S3 Appendix. Participant-Independent ML Trials

Table 1: The performance of participant-independent TPOT models.

| trial                     | train SCC | train SCC p-value | test SCC | test SCC p-value |
|---------------------------|-----------|-------------------|----------|------------------|
| Both, word vectors        | 0.99      | 0                 | -0.05    | 0.61             |
| English word vectors      | 0.99      | 0                 | 0.13     | 0.36             |
| English, one-hot encoding | 0.99      | 0                 | 0.02     | 0.91             |
| Russian word vectors      | 0.97      | 0                 | 0.08     | 0.59             |
| Russian word vectors      | 0.98      | 0                 | 0.18     | 0.22             |

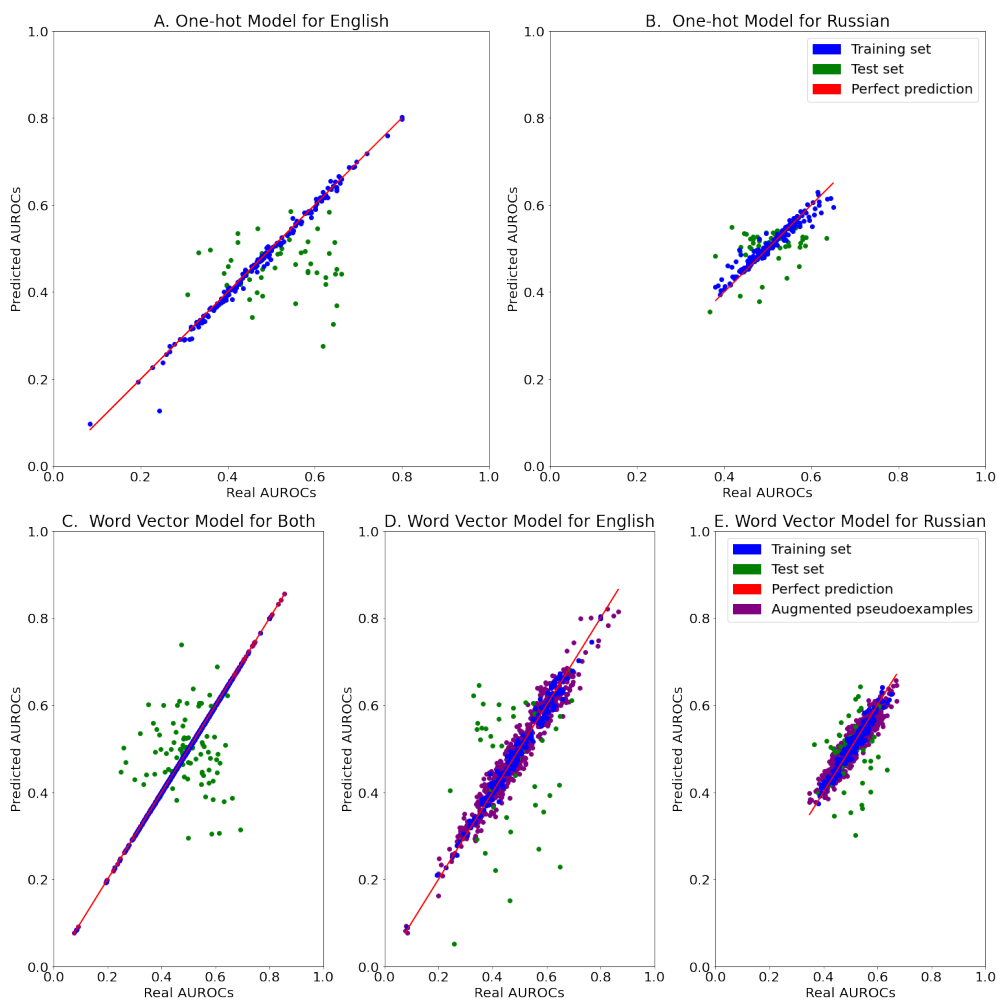

Figure 2: The prediction plots for one-hot encoding-based model for English (A) and Russian (B) words shows clear lack of generalization ability. We were able to overfit our AutoPyTorch model for the training set. Same follows for word vector-based models for both English and Russian words combined (C), only English (D) and only Russian (E).
