# Supplementary material for: Examining the effects of transcranial direct current stimulation on human episodic memory with machine learning
Source: PubMed Central journal article supplement (PMC7725363; doi:10.1371/journal.pone.0235179), 2020-12-09
Supplement: pone.0235179.s004.pdf [file pone.0235179.s004.pdf]

## S4 Appendix. Participant-Dependent ML Trials

Table 2: The performance of participant-dependent AutoPyTorch models based on one-hot encoding. Most of the times the performance is very poor both in the training and testing set. We were unable to fit a good model for each participants, we didn't even get it to overfit the training set.

| trial                 | train AUROC $\pm$ std | test AUROC $\pm$ std |
|-----------------------|-----------------------|----------------------|
| Russian All           | 0.50 $\pm$ 0.01       | 0.50 $\pm$ 0.02      |
| Russian Sham          | 0.50 $\pm$ 0.01       | 0.50 $\pm$ 0.02      |
| Russian VLPFC         | 0.50 $\pm$ 0.00       | 0.50 $\pm$ 0.01      |
| Russian DLPFC Offline | 0.50 $\pm$ 0.02       | 0.51 $\pm$ 0.03      |
| Russian DLPFC Online  | 0.50 $\pm$ 0.00       | 0.50 $\pm$ 0.02      |
| English All           | 0.50 $\pm$ 0.0        | 0.50 $\pm$ 0.01      |
| English Sham          | 0.50 $\pm$ 0.00       | 0.50 $\pm$ 0.01      |
| English VLPFC         | 0.50 $\pm$ 0.00       | 0.50 $\pm$ 0.01      |

Table 3: The performance of participant-dependent TPOT models based on FastText word vectors. The performance is rather poor on the testing set. Unlike the models based on one-hot encoded models, we were able to overfit them on the training set with 10-fold crossvalidation, but the generalization ability remained very low.

| trial                 | train AUROC $\pm$ std | test AUROC $\pm$ std |
|-----------------------|-----------------------|----------------------|
| Russian All           | 1.0 $\pm$ 0.0         | 0.51 $\pm$ 0.07      |
| Russian Sham          | 1.0 $\pm$ 0.0         | 0.52 $\pm$ 0.07      |
| Russian VLPFC         | 1.0 $\pm$ 0.0         | 0.50 $\pm$ 0.07      |
| Russian DLPFC Offline | 1.0 $\pm$ 0.0         | 0.54 $\pm$ 0.08      |
| Russian DLPFC Online  | 1.0 $\pm$ 0.0         | 0.51 $\pm$ 0.06      |
| English All           | 1.0 $\pm$ 0.0         | 0.47 $\pm$ 0.07      |
| English Sham          | 1.0 $\pm$ 0.0         | 0.47 $\pm$ 0.07      |
| English VLPFC         | 1.0 $\pm$ 0.0         | 0.47 $\pm$ 0.07      |
